# Supplementary material
Source: PubMed Central journal article supplement (PMC3570723)

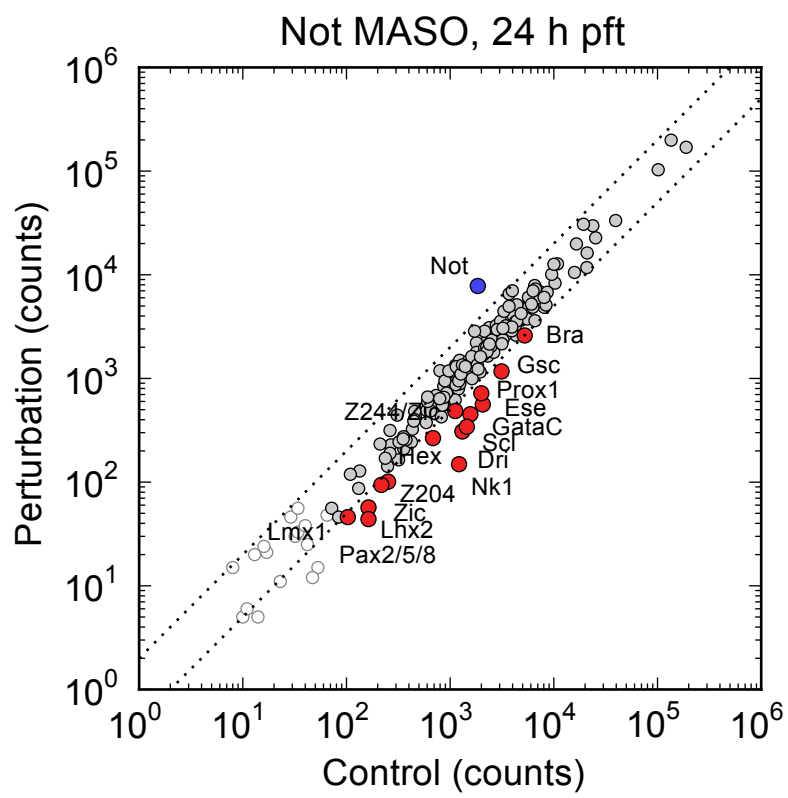

Supplement: NIHMS437601-supplement-01.pdf [file NIHMS437601-supplement-01.pdf]

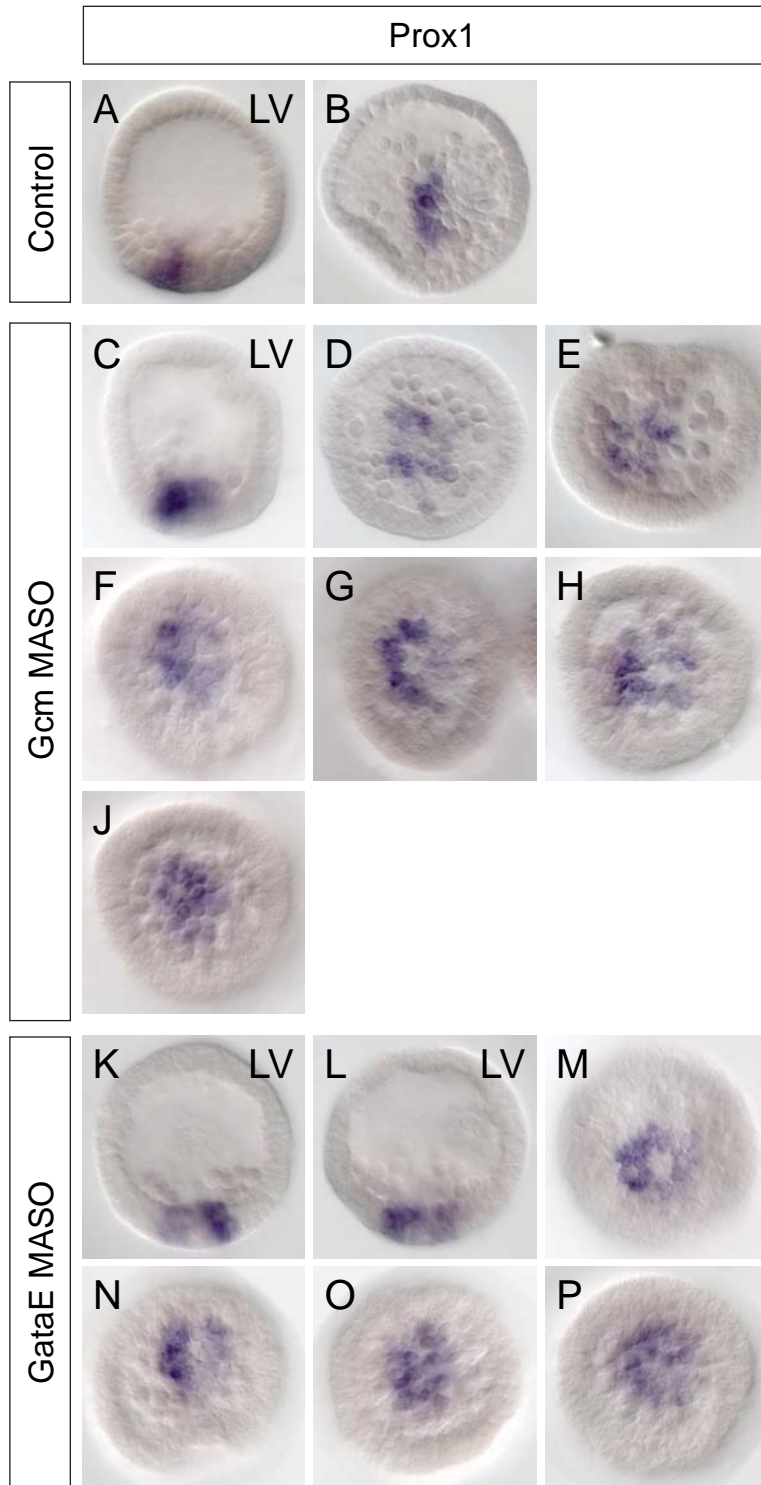

Supplement: NIHMS437601-supplement-02.pdf [file NIHMS437601-supplement-02.pdf]

### GataE Splice-MASO, 24 hpf

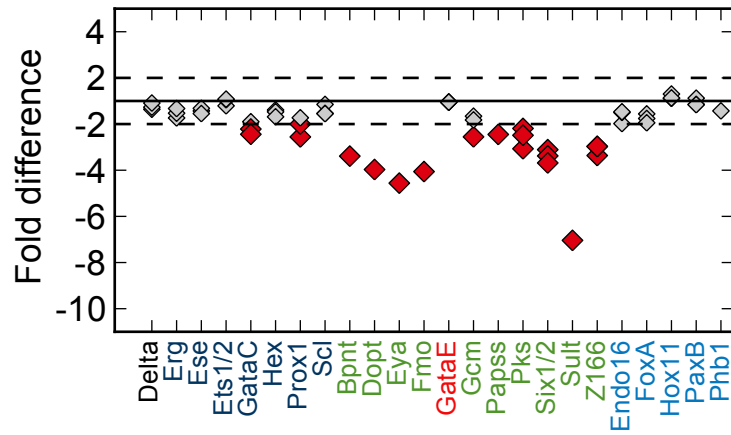

Supplement: NIHMS437601-supplement-03.pdf [file NIHMS437601-supplement-03.pdf]

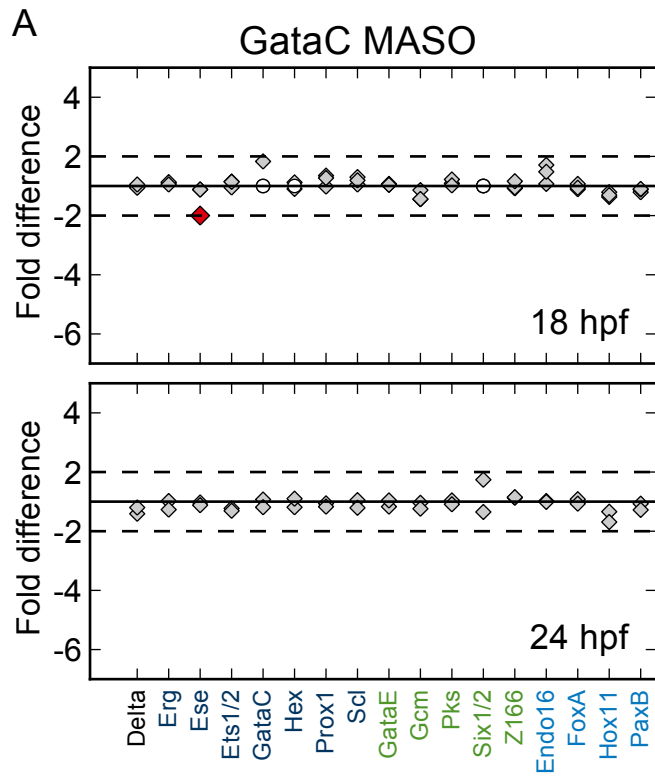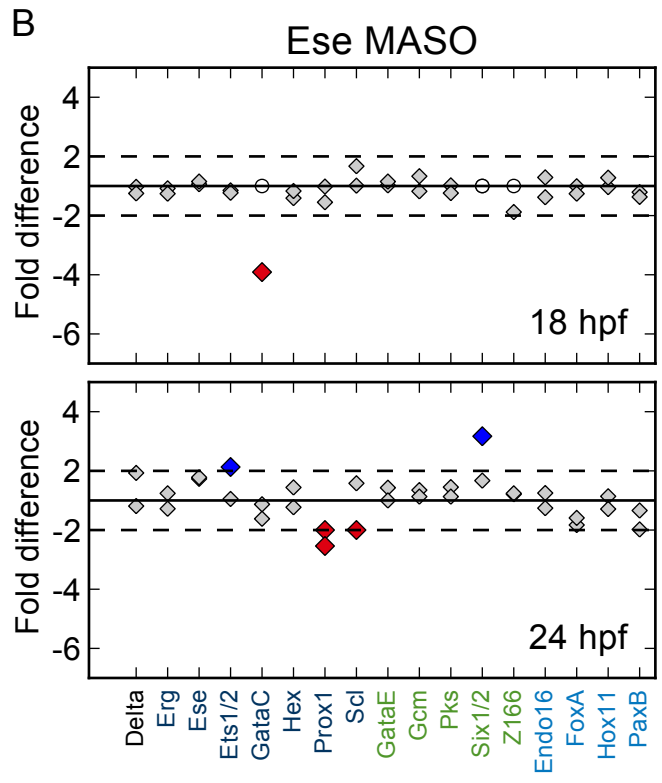

Supplement: NIHMS437601-supplement-04.pdf [file NIHMS437601-supplement-04.pdf]
